# Supplementary material for: ERK1 and ERK2 present functional redundancy in tetrapods despite higher evolution rate of ERK1
Source: PubMed Central journal article supplement (PMC4559367; doi:10.1186/s12862-015-0450-x), 2015-09-03

i

hydrophobic groove of ERKs

|      |                          |      |            |                |     |   |       |     |
|------|--------------------------|------|------------|----------------|-----|---|-------|-----|
| ERK1 | <sup>127</sup> ETDLYKLLK | SQQL | SNDHICYFLY | <sup>149</sup> | 175 | I | NTTCD | 180 |
| ERK2 | <sup>107</sup> ETDLYKLLK | TQHL | SNDHICYFLY | <sup>129</sup> | 155 | L | NTTCD | 160 |

acid patch of ERKs

|      |                     |                |                              |                |                     |                |                       |                |
|------|---------------------|----------------|------------------------------|----------------|---------------------|----------------|-----------------------|----------------|
| ERK1 | <sup>97</sup> RHENI | <sup>101</sup> | <sup>141</sup> NDHICYFLYQILR | <sup>153</sup> | <sup>177</sup> TTCD | <sup>180</sup> | <sup>335</sup> YDPTDE | <sup>340</sup> |
| ERK2 | <sup>77</sup> RHENI | <sup>81</sup>  | <sup>121</sup> NDHICYFLYQILR | <sup>133</sup> | <sup>157</sup> TTCD | <sup>160</sup> | <sup>315</sup> YDPSDE | <sup>320</sup> |

ii

|      |                       |       |                |                    |      |      |                |                      |    |                |
|------|-----------------------|-------|----------------|--------------------|------|------|----------------|----------------------|----|----------------|
| ERK1 | <sup>213</sup> YRAPEI | MLNSK | <sup>221</sup> | <sup>248</sup> GKH | YLDQ | LNHI | <sup>258</sup> | <sup>278</sup> ARNYL | QS | <sup>284</sup> |
| ERK2 | <sup>193</sup> YRAPEI | MLNSK | <sup>201</sup> | <sup>228</sup> GKH | YLDQ | LNHI | <sup>238</sup> | <sup>258</sup> ARNYL | LS | <sup>264</sup> |

## Additional file 1 B

Alignment of ERK1 sequences (MAPK3) from *A.carolinensis* and *M. musculus*  
96.9 % identity after variable N-term (33 differences out of 351 aa)

```

      1                               80
A.caro ERK1  MSAAATAAAPG GAGAVPVPGA PRLGV----- ETVKGVVFDV GPRYTDLQYI GEGAYGMVCS SYDHVNKIRA AIKKISPFEB
M.musc ERK1  MAATAAAPG GGGGEPGRGTA GVVPVVPGEV EVVKGQPFDV GPRYTQLQYI GEGAYGMVSS AYDHVRKTRV AIKKISPFEB

      81                               160
A.caro ERK1  QTYCQRTLRE IKILLRFKHE NVIGINDILR APTIDQMRDV YIVQDLMETD LYKLLKTQQL SNDHICYFLY QILRGLKYIH
M.musc ERK1  QTYCQRTLRE IQILLRFRHE NVIGIRDILR APTLEAMRDV YIVQDLMETD LYKLLKSQQL SNDHICYFLY QILRGLKYIH

      161                               240
A.caro ERK1  SANVLHRDLK PSNLLINTTC DLKICDFGLA RIADPDHDT GFLTEYVATR WYRAPEIMLN SKGYTKSIDEI WSVGCI LAEM
M.musc ERK1  SANVLHRDLK PSNLLINTTC DLKICDFGLA RIADPEHDT GFLTEYVATR WYRAPEIMLN SKGYTKSIDEI WSVGCI LAEM

      241                               320
A.caro ERK1  LSNRPIFP GK HYLDQLNHIL GILGSPSQDD LNCIINMKAR NYLQSLPKP KVPWNKLFPK ADPKALD LLD KMLTFNPNKR
M.musc ERK1  LSNRPIFP GK HYLDQLNHIL GILGSPSQED LNCIINMKAR NYLQSLPKT KVAWAKLFPK SDSKALD LLD RMLTFNPNKR

      321                               381
A.caro ERK1  ITVEESLAHP YLEQYYDPSD EPVAEEPFTF DMELDDL PKE KLKELIFEET ARFQPGYQGP
M.musc ERK1  ITVEEALAH P YLEQYYDPTD EPVAEEPFTF DMELDDL PKE RLKELIFEET ARFQGAPEG P
  
```

Alignment of ERK2 sequences (MAPK1) from *A.carolinensis* and *M. musculus*  
96.9 % identity after variable N-term (11 differences out of 351 aa)

```

      1                               80
A.caro ERK2  MAAVSGAAGG SGANPAGGPE MVRGQAFDVG PRYTNLSYIG EGAYGMVCSA YDNVNKVRVA IKKISPFEBQ TYCQRTLREI
M.musc ERK2  MAATAAAGPE MVRGQVFDVG PRYTNLSYIG EGAYGMVCSA YDNLNKVRVA IKKISPFEBQ TYCQRTLREI

      81                               160
A.caro ERK2  KILLRFKHEN IIGINDIIRA PTTDQMKDVY IVQDLMETDL YKLLKTQHLS NDHICYFLYQ ILRGLKYIHS ANVLHRDLKP
M.musc ERK2  KILLRFRHEN IIGINDIIRA PTIEQMKDVY IVQDLMETDL YKLLKTQHLS NDHICYFLYQ ILRGLKYIHS ANVLHRDLKP

      161                               240
A.caro ERK2  SNLLLNNTCD LKVCDFGLAR VADPDHDTG FLTEYVATRW YRAPEIMLNS KGYTKSIDEI WSVGCI LAEML SNRPIFP GK
M.musc ERK2  SNLLLNNTCD LKICDFGLAR VADPDHDTG FLTEYVATRW YRAPEIMLNS KGYTKSIDEI WSVGCI LAEML SNRPIFP GK

      241                               320
A.caro ERK2  YLDQLNHILG ILGSPSQEDL NCIINLKARN YLLSLPYKNK VPWNRLF PNA DAKALD LLDK MLTFNPHKRI EVEALAH PY
M.musc ERK2  YLDQLNHILG ILGSPSQEDL NCIINLKARN YLLSLPHKNK VPWNRLF PNA DSKALD LLDK MLTFNPHKRI EVEQALAH PY

      321                               368
A.caro ERK2  LEQYYDPSDE PVAEAPFKFD MELDDL PKEK LKELIFEETA RFQPGYRC
M.musc ERK2  LEQYYDPSDE PIAEAPFKFD MELDDL PKEK LKELIFEETA RFQPGYRS
  
```

Differences between human-ERK1 and human-ERK2

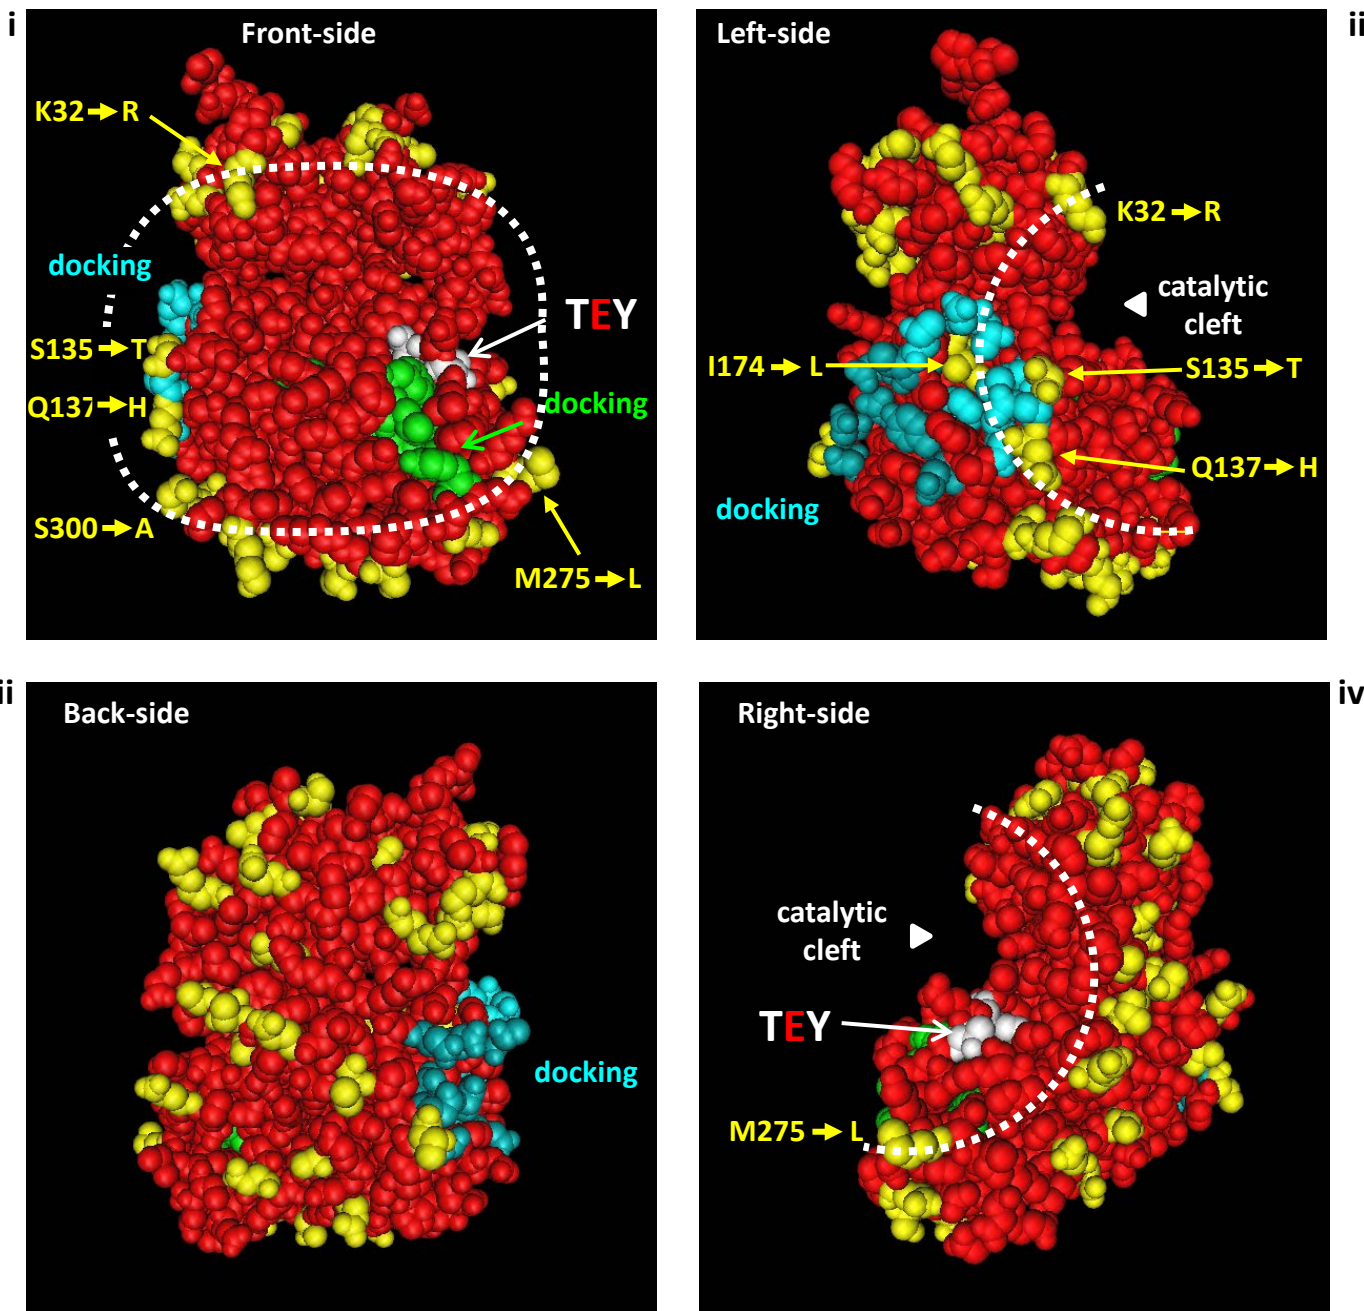

Differences between rat-ERK2 and anolis-ERK2

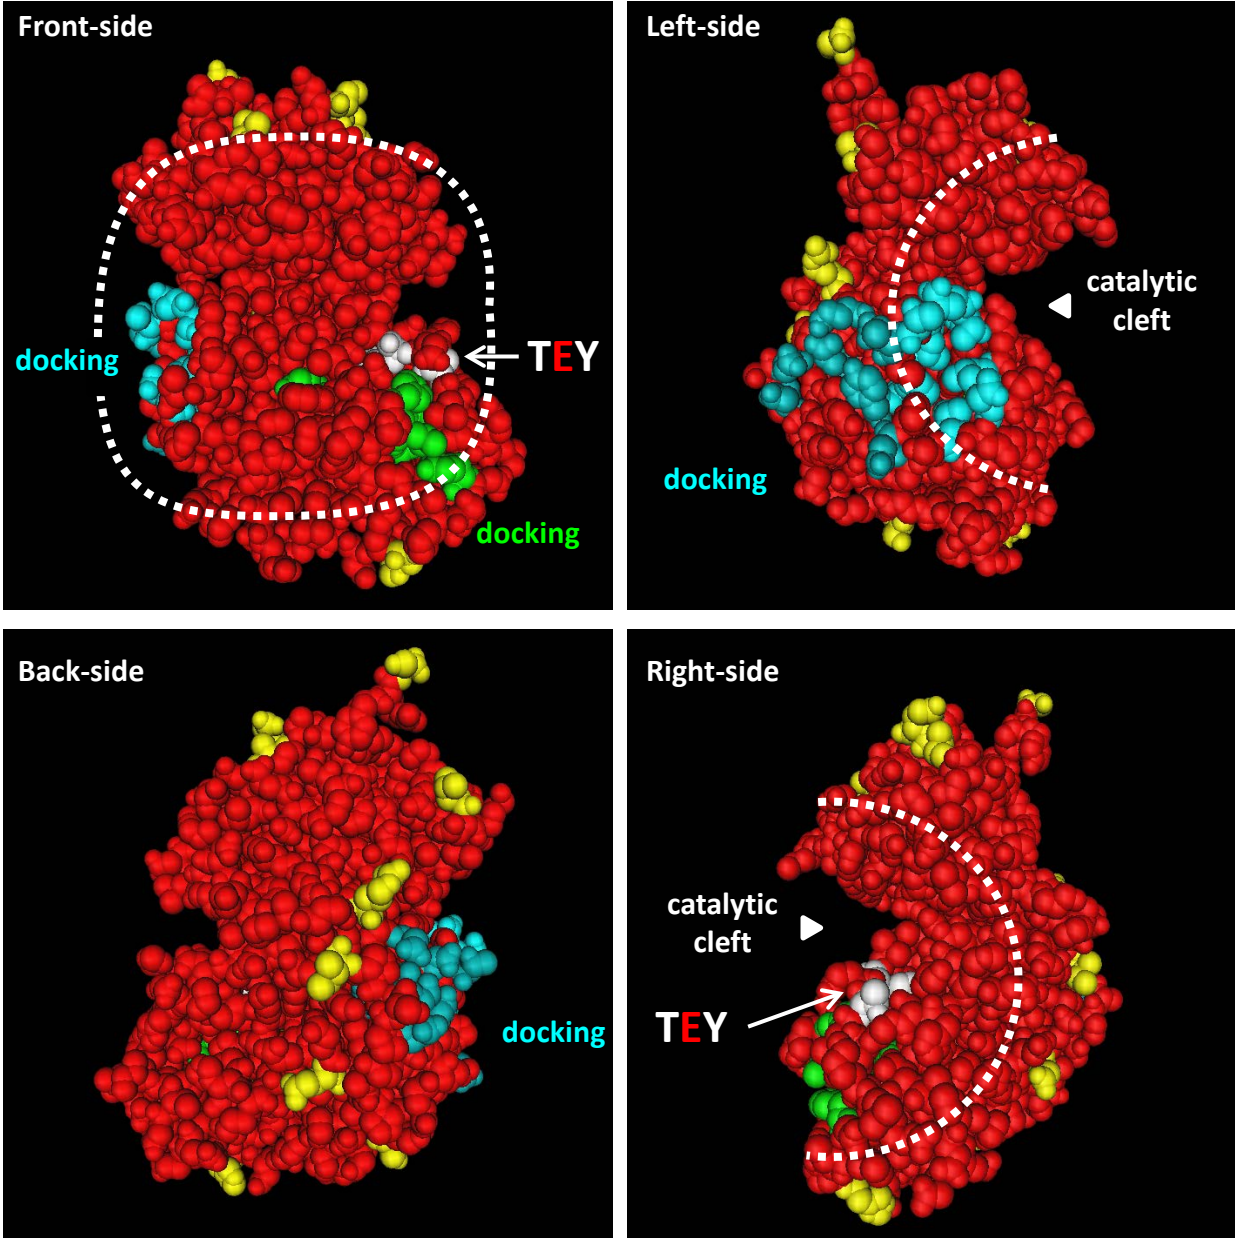

Differences between human-ERK1 and anolis-ERK1

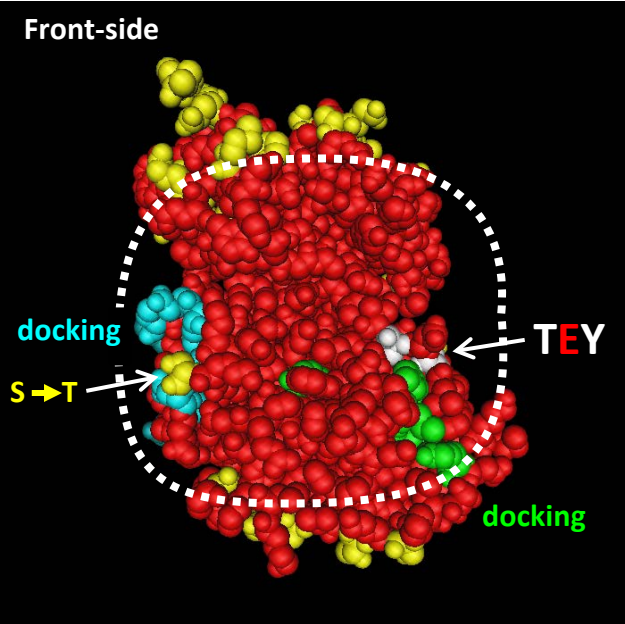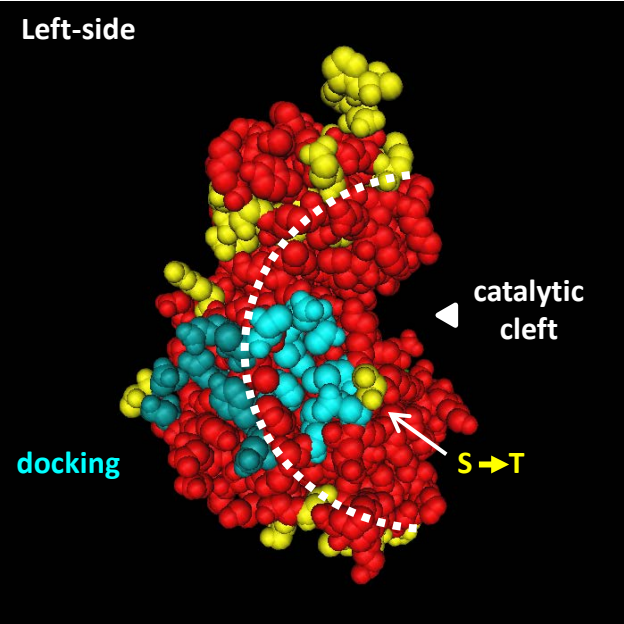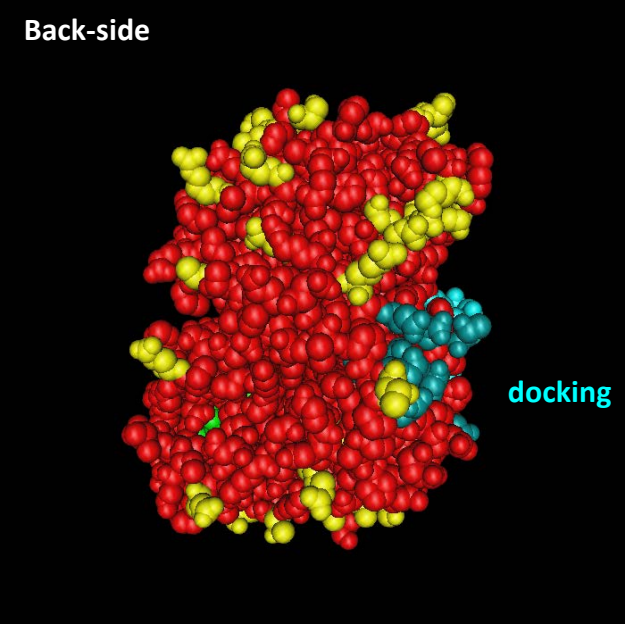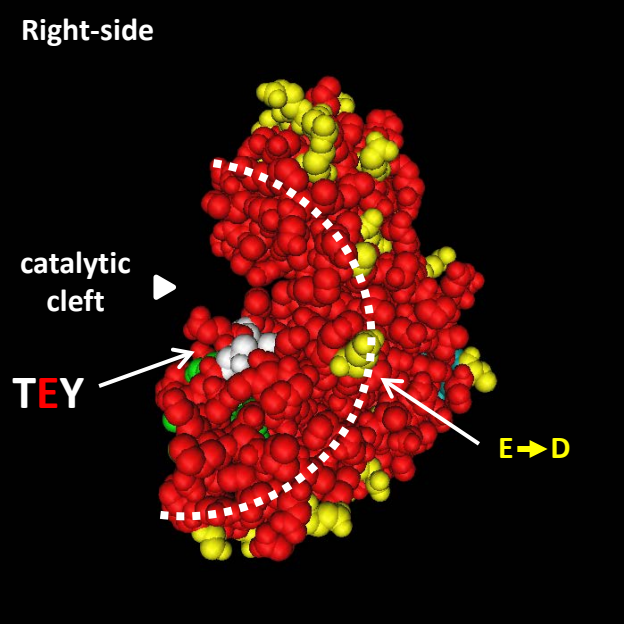

Supplement: 12862_2015_450_MOESM1_ESM.pdf [file 12862_2015_450_MOESM1_ESM.pdf]
