# Supplementary material for: ERK1 and ERK2 present functional redundancy in tetrapods despite higher evolution rate of ERK1
Source: PubMed Central journal article supplement (PMC4559367; doi:10.1186/s12862-015-0450-x), 2015-09-03

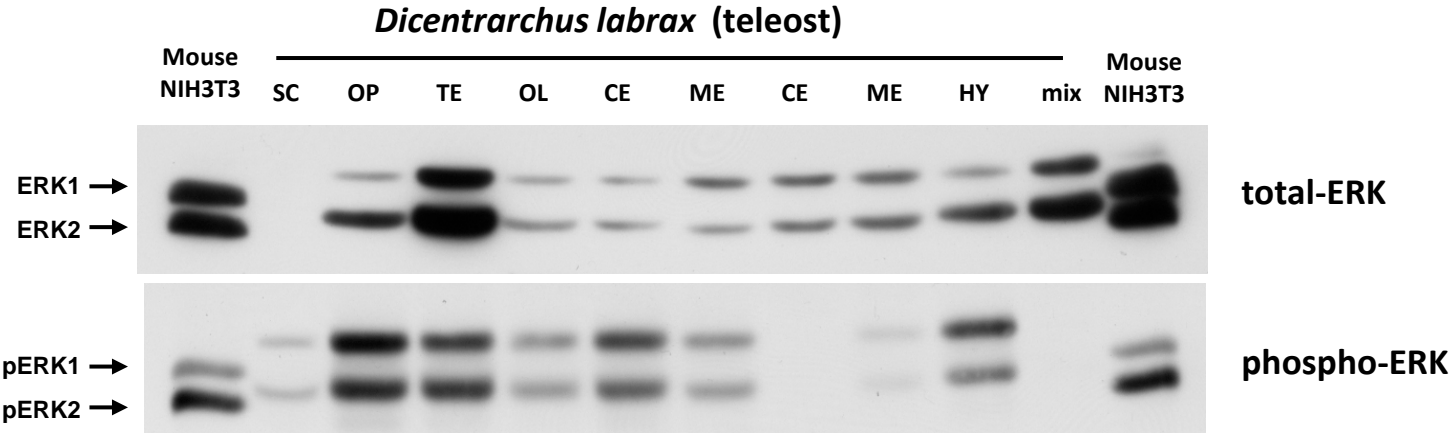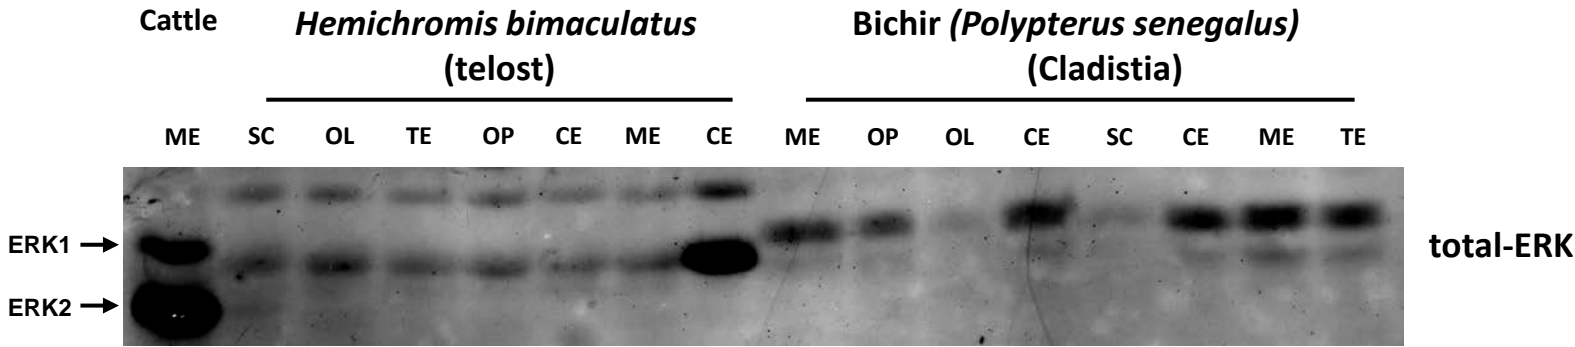

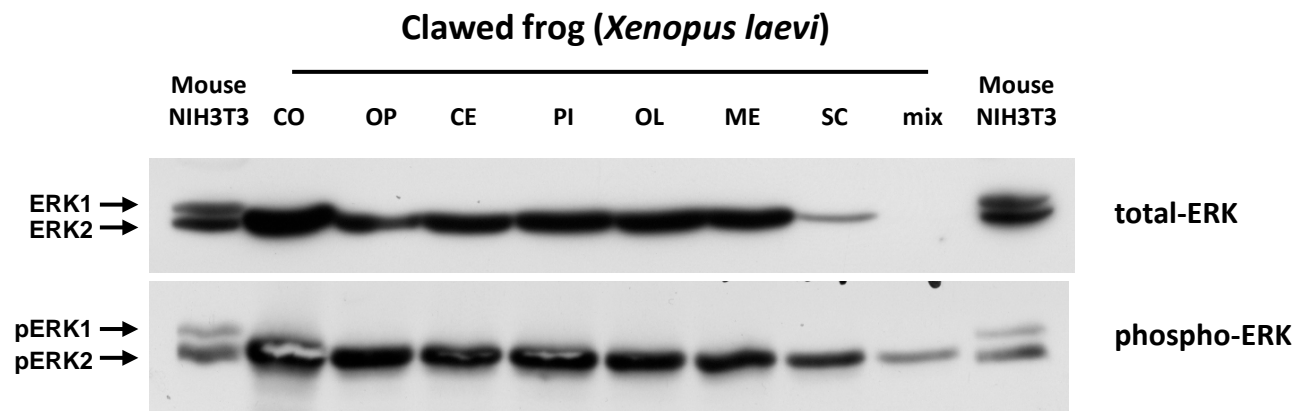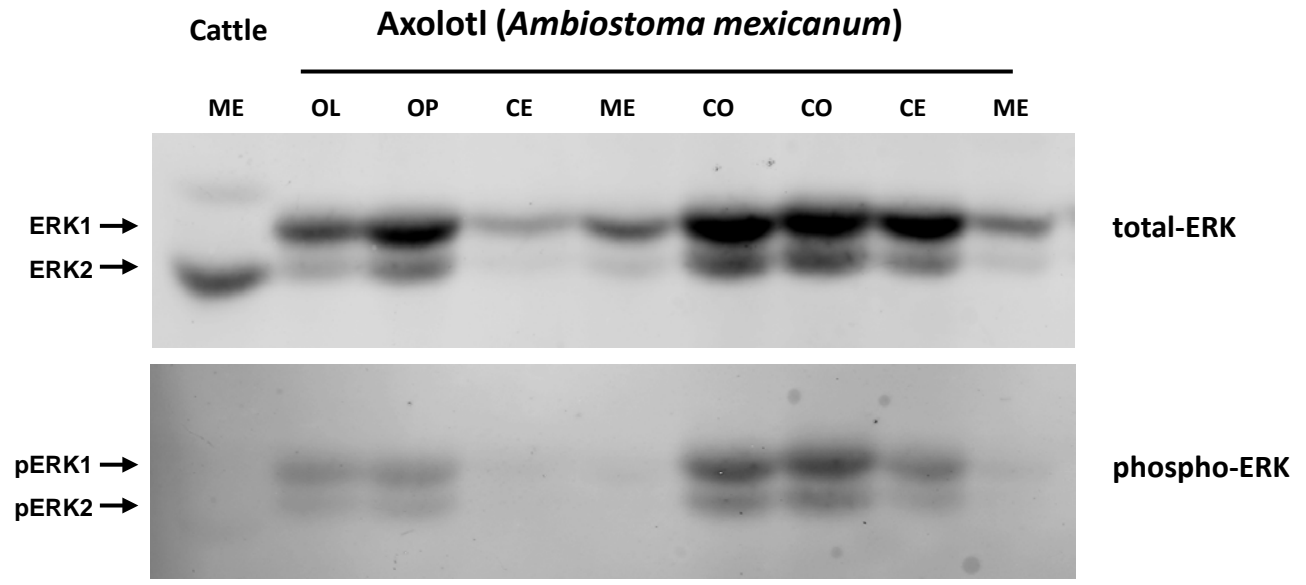

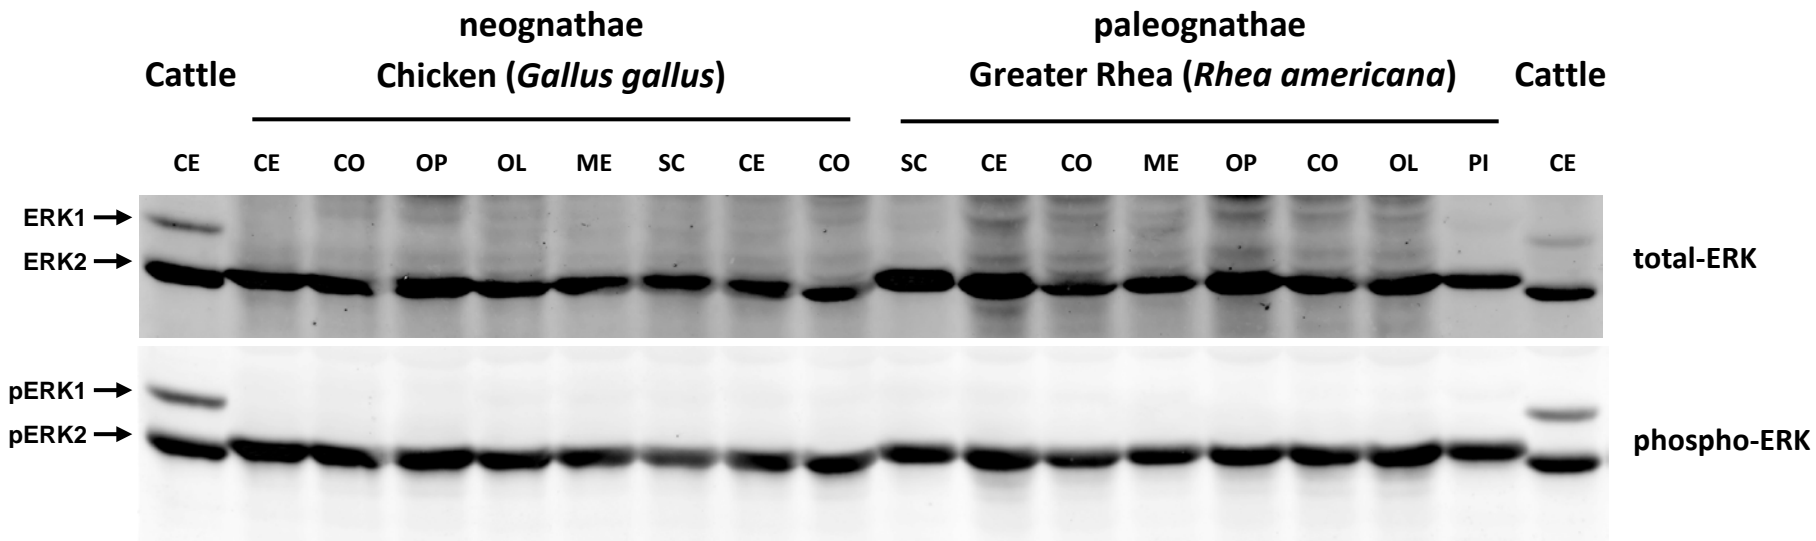

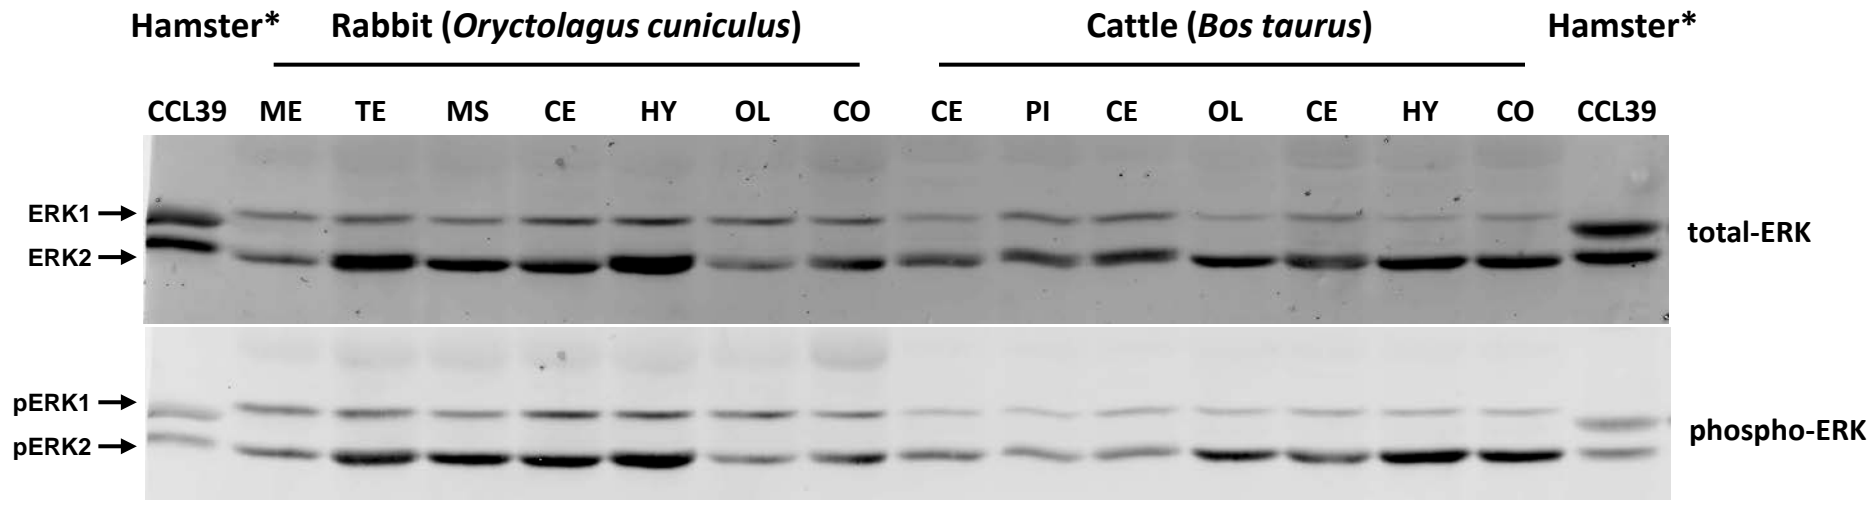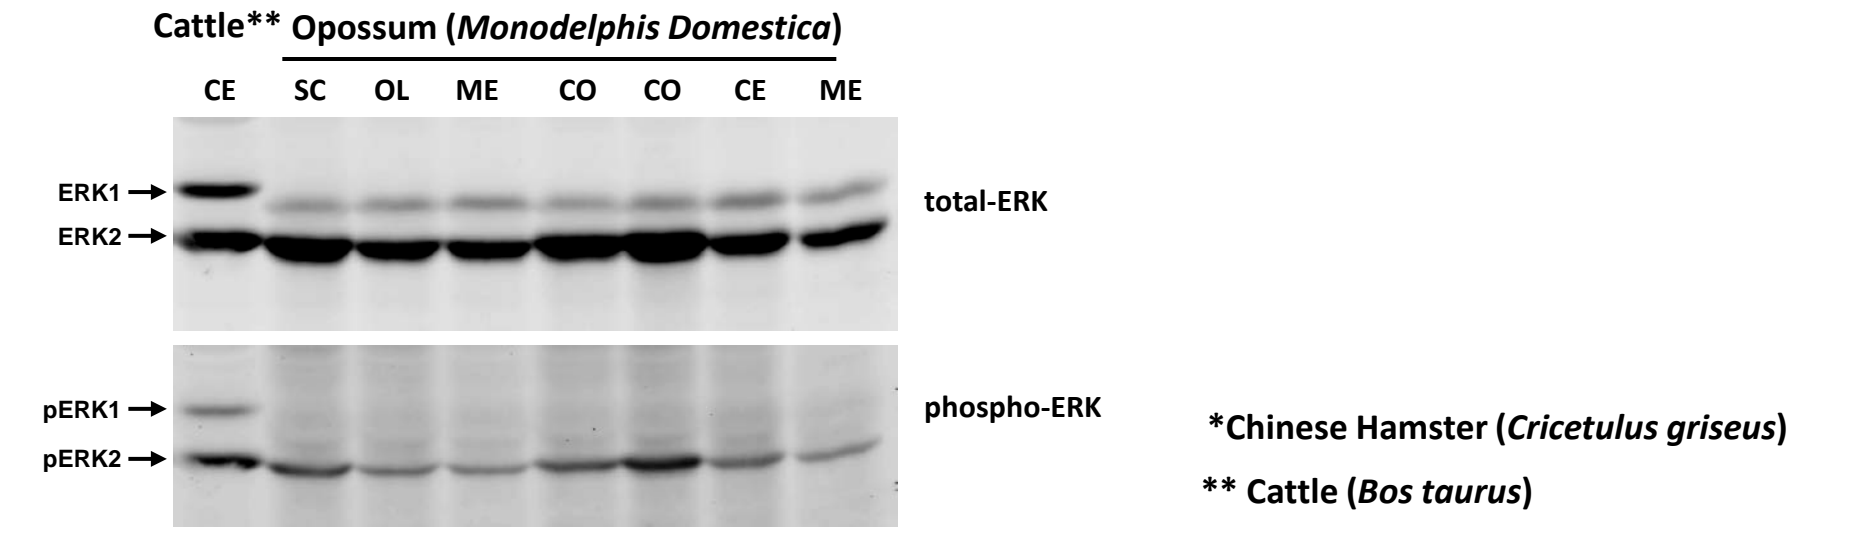

Supplement: 12862_2015_450_MOESM2_ESM.pdf [file 12862_2015_450_MOESM2_ESM.pdf]
