# Supplementary material for: ERK1 and ERK2 present functional redundancy in tetrapods despite higher evolution rate of ERK1
Source: PubMed Central journal article supplement (PMC4559367; doi:10.1186/s12862-015-0450-x), 2015-09-03

A

Neighbor joining  
nucleic sequences

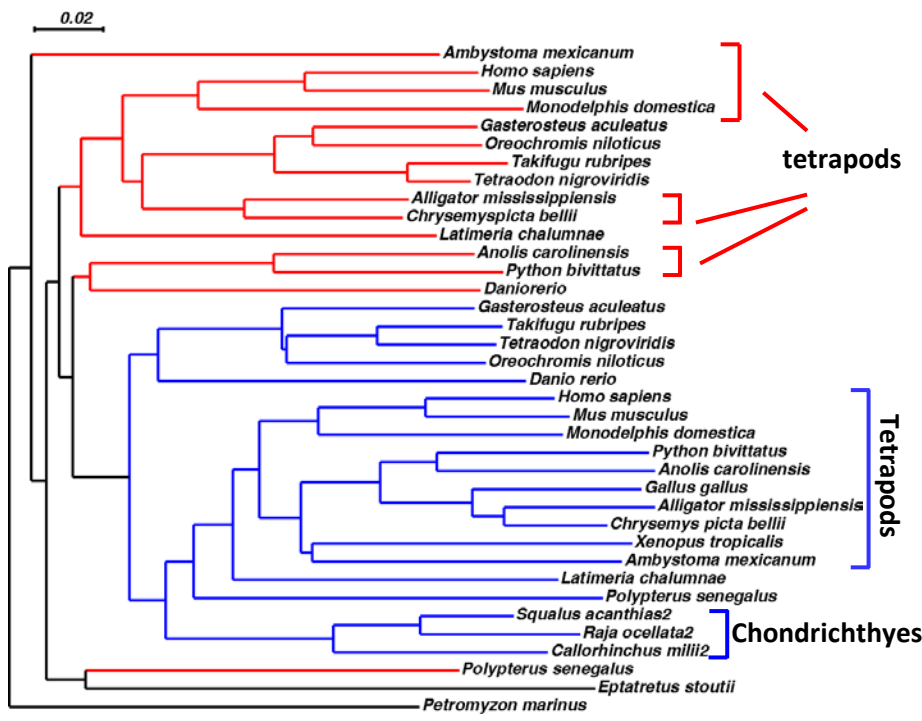

B

Neighbor joining  
protein sequences

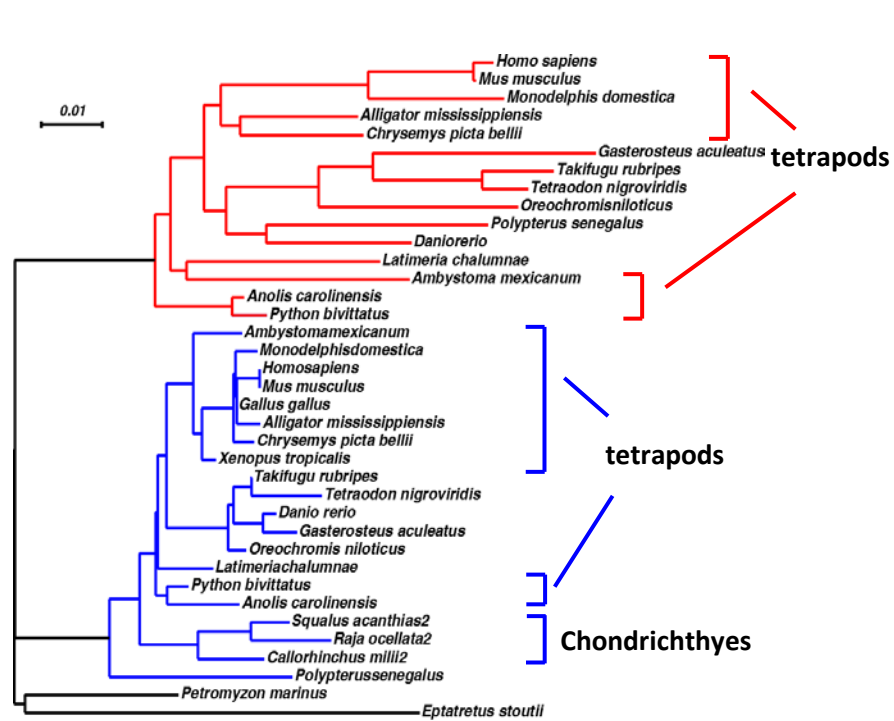

**erk1/ERK1** (mapk3/MAPK3)

**erk2/ERK2** (mapk1/MAPK1)

C

Parsimony  
nucleic sequences

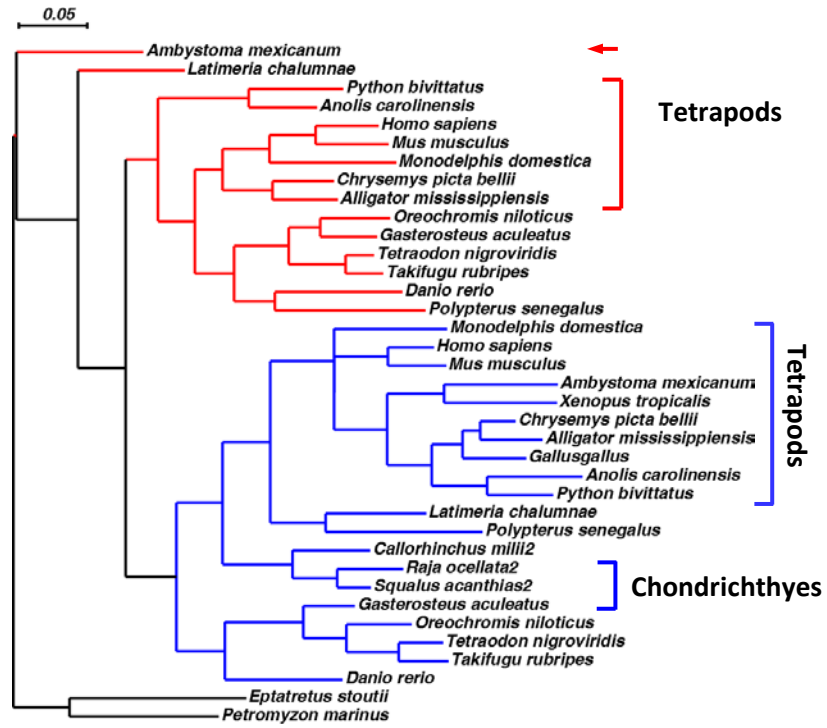

D

Parsimony  
protein sequences

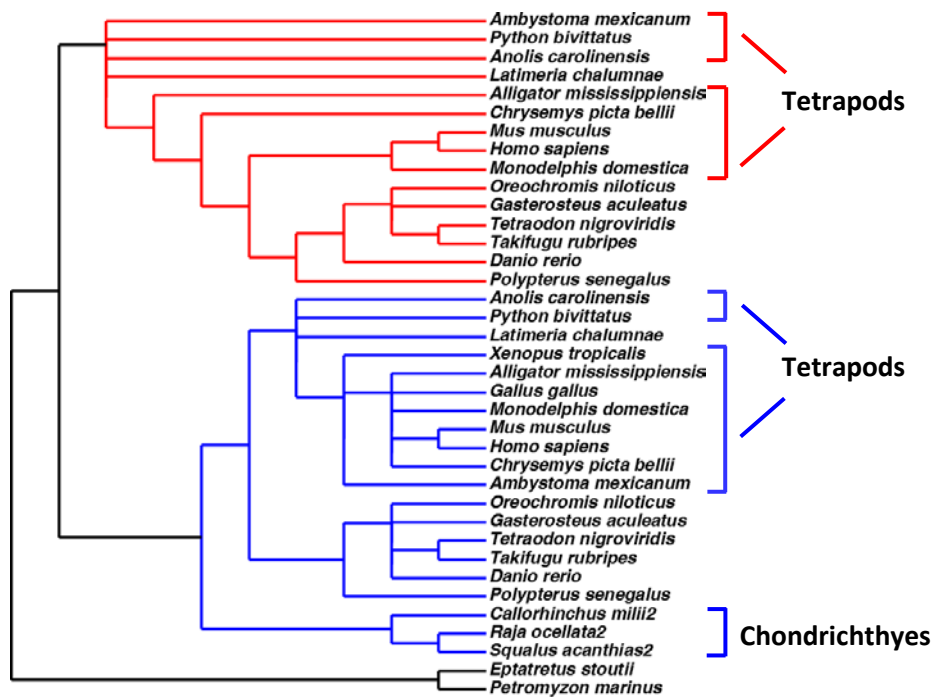

**erk1/ERK1** (mapk3/MAPK3)  
**erk2/ERK2** (mapk1/MAPK1)

E

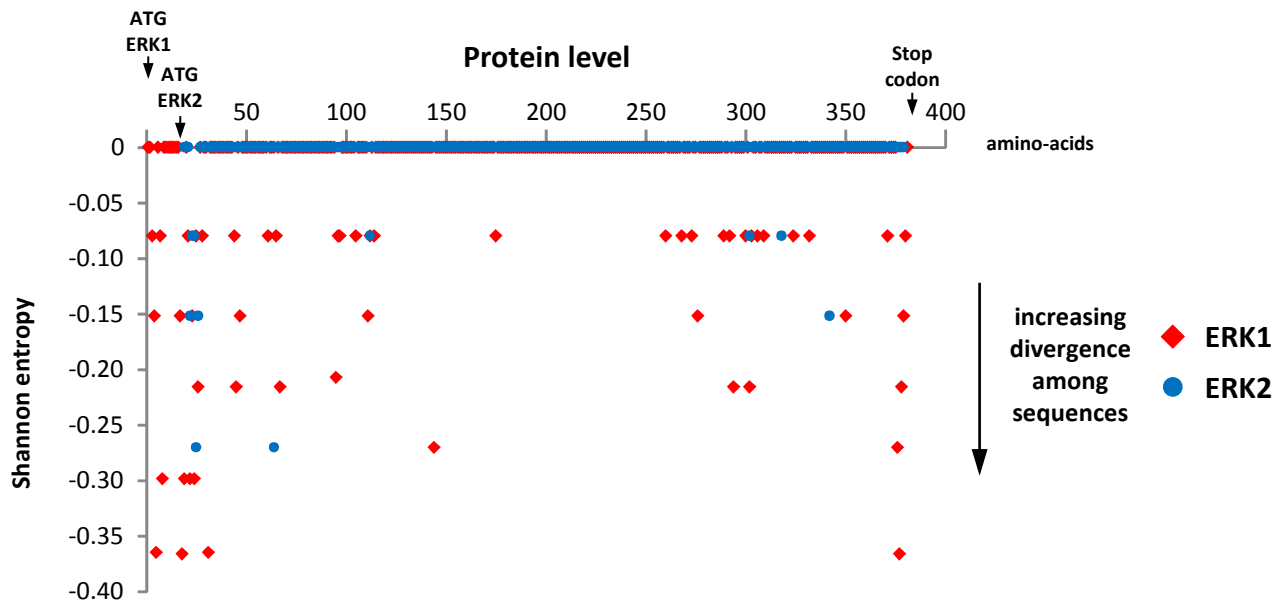

F

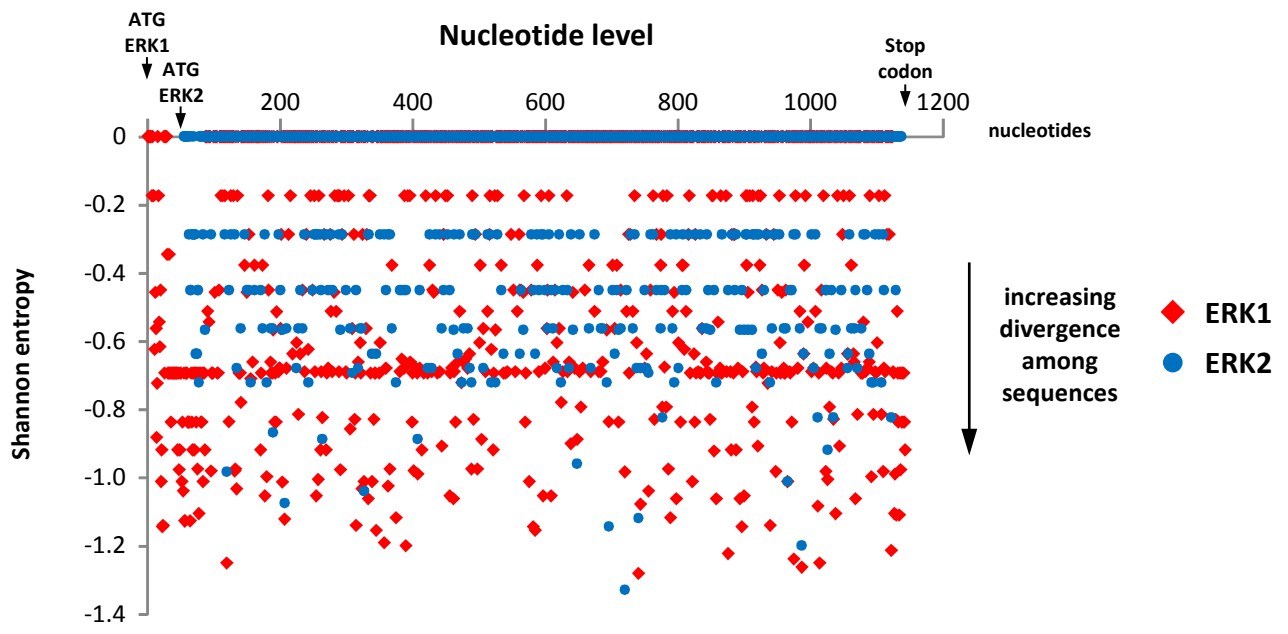

Supplement: 12862_2015_450_MOESM5_ESM.pdf [file 12862_2015_450_MOESM5_ESM.pdf]
