# Supplementary material for: ERK1 and ERK2 present functional redundancy in tetrapods despite higher evolution rate of ERK1
Source: PubMed Central journal article supplement (PMC4559367; doi:10.1186/s12862-015-0450-x), 2015-09-03
Supplement: 12862_2015_450_MOESM6_ESM.pdf [file 12862_2015_450_MOESM6_ESM.pdf]

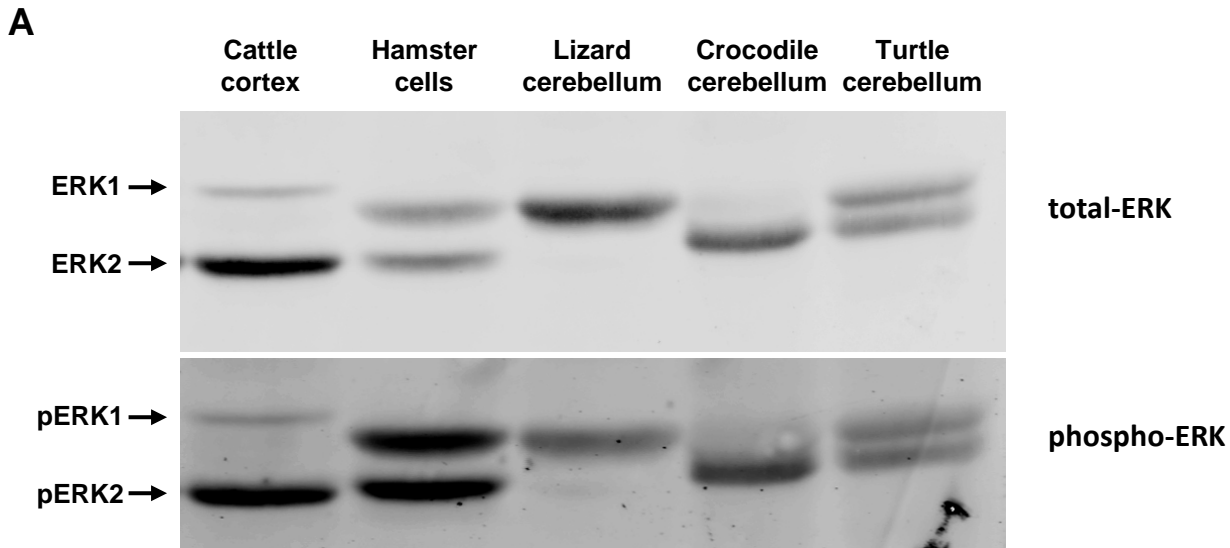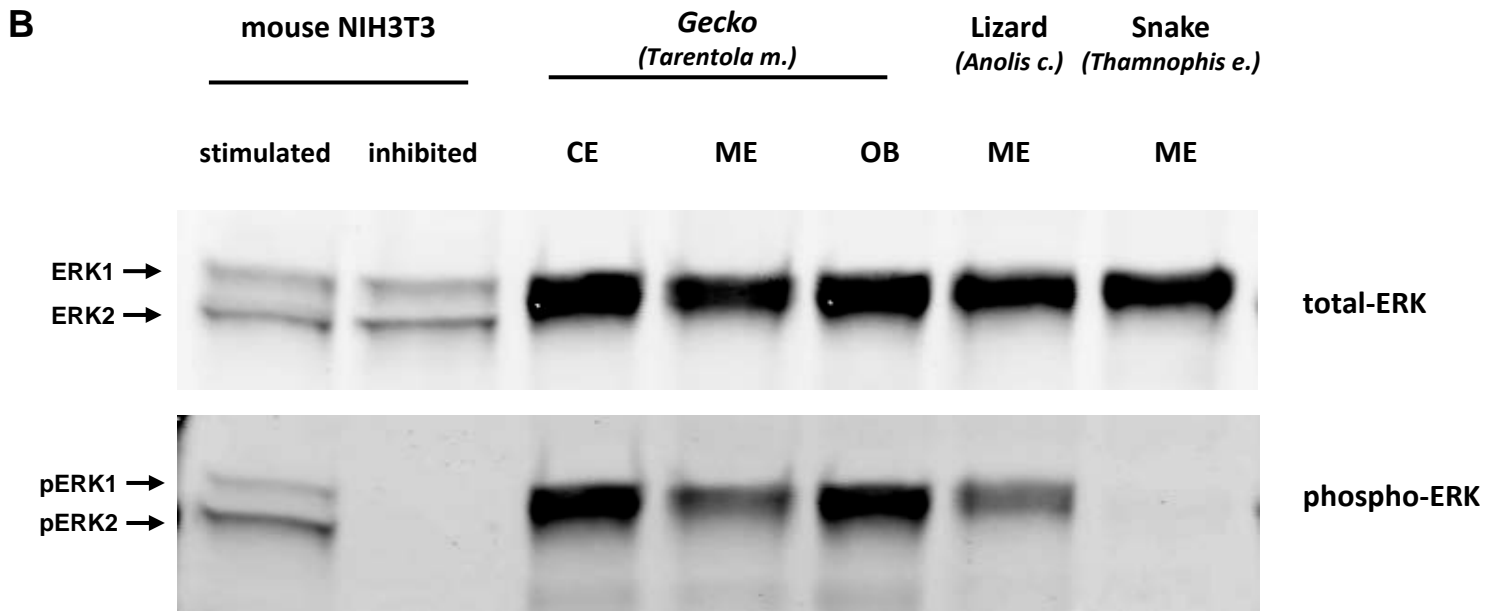

**C**

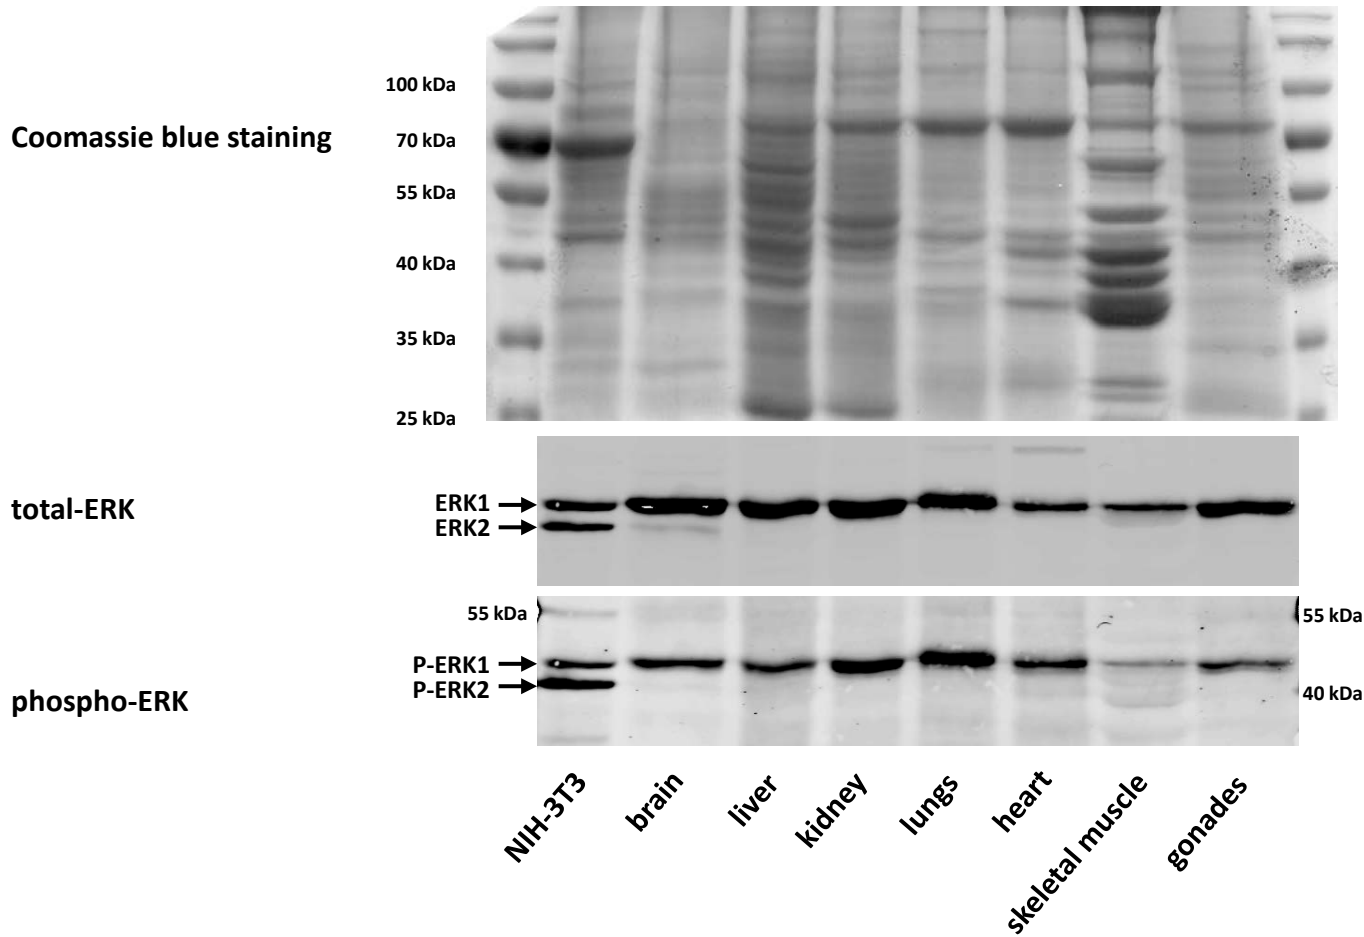

D

**Names of reptiles studied**

|                  |                                                                                                                                                                                                                          |
|------------------|--------------------------------------------------------------------------------------------------------------------------------------------------------------------------------------------------------------------------|
| <b>Snakes</b>    | <ul style="list-style-type: none"><li>- <i>Pantherophis guttatus guttatus</i></li><li>- <i>Pituophis catenifer sayi</i></li><li>- <i>Lampropeltis triangulum campbelli</i></li><li>- <i>Thamnophis elegans</i></li></ul> |
| <b>Lizards</b>   | <ul style="list-style-type: none"><li>- <i>Anolis carolinensis</i></li><li>- <i>Anolis sagrei</i></li><li>- <i>Podarcis muralis</i></li><li>- <i>Agama agama</i></li></ul>                                               |
| <b>Gecko</b>     | <ul style="list-style-type: none"><li>- <i>Tarentola mauritanica</i></li></ul>                                                                                                                                           |
| <b>Crocodile</b> | <ul style="list-style-type: none"><li>- <i>Crocodylus niloticus</i></li></ul>                                                                                                                                            |
| <b>Turtles</b>   | <ul style="list-style-type: none"><li>- <i>Trachemys scripta elegans</i></li><li>- <i>Emys orbicularis</i></li></ul>                                                                                                     |
